# Supplementary material for: Proton, muon and13C hyperfine coupling constants of C60X and C70X (X = H, Mu)
Source: Royal Society of Chemistry journal article supplement (doi:10.1039/c4cp04899g), 2014-11-26
Supplement: c4cp04899g1.pdf [file c4cp04899g1.pdf]

**Supplementary Information**  
**for**  
**Proton, muon and  $^{13}\text{C}$  hyperfine coupling constants of**  
 **$\text{C}_{60}\text{X}$  and  $\text{C}_{70}\text{X}$  ( $\text{X}=\text{H}, \text{Mu}$ )**

**Jean-Claude Brodovitch, Brenda Addison-Jones, Khashayar Ghandi,**

**Iain McKenzie and Paul W. Percival\***

**CONTENTS**

Optimized geometries, hyperfine constants, and Mulliken spin densities:

|                 |                                               |     |
|-----------------|-----------------------------------------------|-----|
| <b>Table S1</b> | $\text{C}_{60}\text{H}$ .....                 | S2  |
| <b>Table S2</b> | $\text{C}_{70}\text{H}$ Isomer <b>A</b> ..... | S4  |
| <b>Table S3</b> | $\text{C}_{70}\text{H}$ Isomer <b>B</b> ..... | S6  |
| <b>Table S4</b> | $\text{C}_{70}\text{H}$ Isomer <b>C</b> ..... | S8  |
| <b>Table S5</b> | $\text{C}_{70}\text{H}$ Isomer <b>D</b> ..... | S10 |
| <b>Table S6</b> | $\text{C}_{70}\text{H}$ Isomer <b>E</b> ..... | S12 |

**Table S1.** C<sub>60</sub>H

UB3LYP/6-311G(d,p)

|       | Cartesian coordinates /Å |          |          | hfc /MHz | Mulliken spin density (%) |
|-------|--------------------------|----------|----------|----------|---------------------------|
| C(13) | -3.63606                 | -0.39043 | -1.04260 | -15.7    | -5.1                      |
| C(13) | -2.68786                 | -0.61559 | -2.23190 | 18.6     | 6.4                       |
| C(13) | -2.05787                 | -1.89747 | -2.11760 | -2.7     | -1.2                      |
| C(13) | -2.37183                 | -2.45589 | -0.81287 | -2.7     | -1.2                      |
| C(13) | -3.20015                 | -1.52690 | -0.10311 | 18.6     | 6.4                       |
| C(13) | -3.00895                 | -1.34246 | 1.25016  | -11.2    | -4.8                      |
| C(13) | -3.01941                 | 0.00756  | 1.83671  | 23.8     | 23.4                      |
| C(13) | -3.18589                 | 1.11659  | 1.00016  | -27.7    | -13.8                     |
| C(13) | -3.39604                 | 0.96383  | -0.40511 | 50.1     | 45.8                      |
| C(13) | -2.68576                 | 2.00597  | -1.07721 | -27.7    | -13.8                     |
| C(13) | -2.02620                 | 1.77403  | -2.28909 | 23.9     | 23.4                      |
| C(13) | -2.02002                 | 0.41621  | -2.85755 | -11.2    | -4.8                      |
| C(13) | -0.71752                 | 0.19293  | -3.44187 | 2.7      | 3.6                       |
| C(13) | -0.12210                 | -1.06730 | -3.37545 | -2.5     | -1.0                      |
| C(13) | -0.80726                 | -2.13855 | -2.69756 | 2.1      | 2.5                       |
| C(13) | 0.18036                  | -2.92948 | -1.98597 | -0.3     | 0.8                       |
| C(13) | -0.12044                 | -3.46413 | -0.73671 | -0.3     | 0.8                       |
| C(13) | -1.42335                 | -3.23399 | -0.13941 | 2.1      | 2.5                       |
| C(13) | -1.24326                 | -3.06079 | 1.27997  | -2.5     | -1.0                      |
| C(13) | -2.01813                 | -2.11949 | 1.95898  | 2.7      | 3.6                       |
| C(13) | -1.41272                 | -1.27039 | 2.96633  | 2.6      | 2.8                       |
| C(13) | -2.03223                 | 0.04173  | 2.88520  | -13.6    | -6.0                      |
| C(13) | -1.25587                 | 1.18747  | 3.09620  | 10.9     | 11.0                      |
| C(13) | -1.43799                 | 2.34503  | 2.24045  | -6.1     | -3.5                      |
| C(13) | -2.38144                 | 2.31227  | 1.22082  | 5.2      | 5.1                       |
| C(13) | -2.06924                 | 2.86691  | -0.07519 | 5.2      | 5.1                       |
| C(13) | -0.82384                 | 3.43669  | -0.30989 | -6.1     | -3.5                      |
| C(13) | -0.13443                 | 3.18124  | -1.56080 | 10.9     | 11.0                      |
| C(13) | -0.72986                 | 2.35709  | -2.52310 | -13.6    | -6.0                      |
| C(13) | 0.08116                  | 1.38561  | -3.23755 | 2.6      | 2.8                       |
| C(13) | 1.44157                  | 1.27529  | -2.96928 | -3.6     | -2.1                      |
| C(13) | 2.06037                  | -0.03731 | -2.88758 | -1.2     | -0.7                      |

|       |          |          |          |      |      |
|-------|----------|----------|----------|------|------|
| C(13) | 1.29477  | -1.18362 | -3.08765 | 1.0  | 0.9  |
| C(13) | 1.48312  | -2.33873 | -2.22859 | -0.9 | -0.5 |
| C(13) | 2.43109  | -2.30163 | -1.20883 | 0.5  | 0.2  |
| C(13) | 2.11718  | -2.85941 | 0.09444  | 0.5  | 0.2  |
| C(13) | 0.86834  | -3.43152 | 0.32446  | -0.9 | -0.5 |
| C(13) | 0.17240  | -3.17903 | 1.57328  | 1.0  | 0.9  |
| C(13) | 0.75374  | -2.36031 | 2.53857  | -1.2 | -0.7 |
| C(13) | -0.05696 | -1.38898 | 3.25393  | -3.6 | -2.1 |
| C(13) | 0.74657  | -0.19879 | 3.46448  | 6.8  | 6.7  |
| C(13) | 0.15557  | 1.06240  | 3.38309  | -7.6 | -3.8 |
| C(13) | 0.85123  | 2.14533  | 2.70805  | 1.8  | 1.1  |
| C(13) | -0.13614 | 2.94044  | 2.00173  | 0.1  | -0.3 |
| C(13) | 0.16486  | 3.47543  | 0.75174  | 0.1  | -0.3 |
| C(13) | 1.46623  | 3.23877  | 0.15471  | 1.8  | 1.1  |
| C(13) | 1.27744  | 3.05718  | -1.27510 | -7.6 | -3.8 |
| C(13) | 2.05413  | 2.12603  | -1.96548 | 6.8  | 6.7  |
| C(13) | 3.04141  | 1.33772  | -1.25684 | -4.7 | -2.4 |
| C(13) | 3.21947  | 1.50864  | 0.11386  | 2.9  | 2.2  |
| C(13) | 2.41365  | 2.47880  | 0.83347  | -1.5 | -1.4 |
| C(13) | 2.09987  | 1.92085  | 2.13691  | -1.5 | -1.4 |
| C(13) | 2.71251  | 0.60694  | 2.22027  | 2.9  | 2.2  |
| C(13) | 3.40349  | 0.35377  | 0.97099  | -3.5 | -2.3 |
| C(13) | 3.41103  | -0.92896 | 0.42365  | 4.2  | 3.8  |
| C(13) | 2.72247  | -2.01010 | 1.10210  | -3.4 | -1.9 |
| C(13) | 2.05269  | -1.76650 | 2.30024  | 3.6  | 3.5  |
| C(13) | 2.04764  | -0.42956 | 2.87104  | -4.7 | -2.4 |
| C(13) | 3.04646  | 0.00103  | -1.82804 | 3.6  | 3.5  |
| C(13) | 3.22942  | -1.10838 | -1.00396 | -3.4 | -1.9 |
| H     | -4.68844 | -0.50459 | -1.34463 | 94.3 | 3.9  |

---

**Table S2.** C<sub>70</sub>H Isomer A

UB3LYP/6-311G(d,p)

SCF Energy -2668.3654296 a.u.

|       |     | Cartesian coordinates /Å |          |          | hfc /MHz | Mulliken spin density (%) |
|-------|-----|--------------------------|----------|----------|----------|---------------------------|
| C(13) | A1  | -4.23690                 | -1.23541 | -0.00011 | -15.6    | -5.3                      |
| C(13) | A2  | -3.97256                 | -0.29010 | -1.18193 | 19.3     | 6.9                       |
| C(13) | A3  | -3.91518                 | 1.06578  | -0.72393 | -3.6     | -1.5                      |
| C(13) | A4  | -3.91517                 | 1.06563  | 0.72416  | -3.6     | -1.5                      |
| C(13) | A5  | -3.97254                 | -0.29033 | 1.18189  | 19.3     | 6.9                       |
| C(13) | B1  | -3.24933                 | -2.38425 | -0.00024 | 50.5     | 44.0                      |
| C(13) | B2  | -3.22006                 | -0.66647 | -2.27585 | -9.9     | -4.2                      |
| C(13) | B3  | -3.16051                 | 2.02295  | -1.41906 | 3.6      | 4.5                       |
| C(13) | B4  | -3.16049                 | 2.02267  | 1.41948  | 3.6      | 4.5                       |
| C(13) | B5  | -3.22004                 | -0.66692 | 2.27574  | -9.9     | -4.2                      |
| C(13) | C1  | -2.47496                 | -2.72931 | 1.14530  | -25.9    | -12.7                     |
| C(13) | C2  | -2.47498                 | -2.72907 | -1.14580 | -26.0    | -12.7                     |
| C(13) | C3  | -2.46055                 | -1.91789 | -2.27593 | 21.5     | 22.0                      |
| C(13) | C4  | -2.41700                 | 0.30260  | -2.97978 | -0.1     | 1.4                       |
| C(13) | C5  | -2.39576                 | 1.62701  | -2.56792 | -1.0     | 0.0                       |
| C(13) | C6  | -2.36454                 | 2.98579  | -0.69246 | -1.9     | 0.0                       |
| C(13) | C7  | -2.36454                 | 2.98566  | 0.69307  | -1.9     | 0.0                       |
| C(13) | C8  | -2.39574                 | 1.62650  | 2.56825  | -1.0     | 0.0                       |
| C(13) | C9  | -2.41698                 | 0.30200  | 2.97985  | -0.1     | 1.4                       |
| C(13) | C10 | -2.46052                 | -1.91834 | 2.27555  | 21.5     | 22.0                      |
| C(13) | D1  | -1.24152                 | -3.36649 | 0.71116  | 3.3      | 2.9                       |
| C(13) | D2  | -1.24153                 | -3.36634 | -0.71181 | 3.3      | 2.9                       |
| C(13) | D3  | -1.22701                 | -1.70262 | -2.98517 | -12.1    | -5.2                      |
| C(13) | D4  | -1.19803                 | -0.33666 | -3.41998 | 5.8      | 6.7                       |
| C(13) | D5  | -1.14398                 | 2.35664  | -2.56752 | -1.2     | -0.8                      |
| C(13) | D6  | -1.12639                 | 3.19989  | -1.41184 | 1.6      | 2.1                       |
| C(13) | D7  | -1.12638                 | 3.19961  | 1.41249  | 1.6      | 2.1                       |
| C(13) | D8  | -1.14396                 | 2.35613  | 2.56799  | -1.2     | -0.8                      |
| C(13) | D9  | -1.19800                 | -0.33734 | 3.41992  | 5.7      | 6.7                       |
| C(13) | D10 | -1.22698                 | -1.70321 | 2.98485  | -12.1    | -5.2                      |
| C(13) | E1  | -0.03845                 | -3.25017 | 1.44919  | -2.5     | -1.5                      |
| C(13) | E2  | -0.03846                 | -3.24988 | -1.44982 | -2.5     | -1.5                      |
| C(13) | E3  | -0.02695                 | -2.38404 | -2.63475 | 5.5      | 5.7                       |

|       |      |          |          |          |       |      |
|-------|------|----------|----------|----------|-------|------|
| C(13) | E4   | 0.02024  | 0.38248  | -3.52428 | -5.1  | -2.8 |
| C(13) | E5   | 0.04815  | 1.78177  | -3.07649 | 1.1   | 0.5  |
| C(13) | E6   | 0.08579  | 3.49472  | -0.73426 | -1.1  | -0.5 |
| C(13) | E7   | 0.08579  | 3.49458  | 0.73495  | -1.1  | -0.5 |
| C(13) | E8   | 0.04817  | 1.78116  | 3.07684  | 1.1   | 0.5  |
| C(13) | E9   | 0.02027  | 0.38178  | 3.52436  | -5.1  | -2.8 |
| C(13) | E10  | -0.02693 | -2.38457 | 2.63429  | 5.5   | 5.7  |
| C(13) | A1'  | 3.95780  | -1.30511 | -0.00014 | 0.9   | 0.7  |
| C(13) | A2'  | 3.97104  | -0.45241 | -1.17195 | -1.3  | -0.6 |
| C(13) | A3'  | 3.99882  | 0.92725  | -0.72387 | 1.3   | 2.2  |
| C(13) | A4'  | 3.99882  | 0.92710  | 0.72402  | 1.3   | 2.2  |
| C(13) | A5'  | 3.97105  | -0.45265 | 1.17183  | -1.3  | -0.6 |
| C(13) | B1'  | 3.19212  | -2.47028 | -0.00025 | -0.6  | -0.5 |
| C(13) | B2'  | 3.21608  | -0.80180 | -2.29015 | 0.7   | 0.4  |
| C(13) | B3'  | 3.26953  | 1.89413  | -1.41536 | -1.7  | -0.4 |
| C(13) | B4'  | 3.26954  | 1.89385  | 1.41571  | -1.6  | -0.4 |
| C(13) | B5'  | 3.21610  | -0.80225 | 2.28997  | 0.7   | 0.4  |
| C(13) | C1'  | 2.40826  | -2.82518 | 1.16201  | 0.4   | 0.0  |
| C(13) | C2'  | 2.40825  | -2.82496 | -1.16258 | 0.4   | 0.0  |
| C(13) | C3'  | 2.41769  | -2.00769 | -2.28144 | 0.5   | -0.1 |
| C(13) | C4'  | 2.45577  | 0.20492  | -2.99766 | -3.6  | -1.7 |
| C(13) | C5'  | 2.48219  | 1.52279  | -2.56959 | 2.6   | 2.8  |
| C(13) | C6'  | 2.51341  | 2.89195  | -0.69229 | -0.2  | 0.0  |
| C(13) | C7'  | 2.51341  | 2.89181  | 0.69284  | -0.2  | 0.0  |
| C(13) | C8'  | 2.48221  | 1.52228  | 2.56987  | 2.6   | 2.8  |
| C(13) | C9'  | 2.45580  | 0.20432  | 2.99768  | -3.6  | -1.7 |
| C(13) | C10' | 2.41772  | -2.00814 | 2.28103  | 0.5   | -0.1 |
| C(13) | D1'  | 1.16374  | -3.41462 | 0.71571  | -0.1  | -0.9 |
| C(13) | D2'  | 1.16373  | -3.41448 | -0.71638 | -0.1  | -0.9 |
| C(13) | D3'  | 1.18489  | -1.74975 | -2.99635 | -5.2  | -2.9 |
| C(13) | D4'  | 1.20949  | -0.38393 | -3.43659 | 6.1   | 6.1  |
| C(13) | D5'  | 1.26349  | 2.30437  | -2.56670 | -1.6  | -1.0 |
| C(13) | D6'  | 1.28237  | 3.15037  | -1.41130 | 0.9   | 1.0  |
| C(13) | D7'  | 1.28238  | 3.15009  | 1.41191  | 0.9   | 1.0  |
| C(13) | D8'  | 1.26351  | 2.30386  | 2.56714  | -1.6  | -1.0 |
| C(13) | D9'  | 1.20952  | -0.38461 | 3.43650  | 6.1   | 6.1  |
| C(13) | D10' | 1.18492  | -1.75035 | 2.99600  | -5.2  | -2.9 |
| H     | A1-H | -5.27509 | -1.60099 | -0.00013 | 103.3 | 4.3  |

**Table S3** C<sub>70</sub>H Isomer **B**

UB3LYP/6-311G(d,p)

SCF Energy -2668.3654007 a.u.

|       |     | Cartesian coordinates /Å |          |          | hfc /MHz | Mulliken spin density (%) |
|-------|-----|--------------------------|----------|----------|----------|---------------------------|
| C(13) | A1  | 4.02933                  | -1.08404 | 0.00000  | 55.2     | 46.5                      |
| C(13) | A2  | 3.95322                  | -0.24483 | 1.15431  | -25.6    | -12.3                     |
| C(13) | A3  | 3.91246                  | 1.14560  | 0.71944  | 5.6      | 7.4                       |
| C(13) | A4  | 3.91246                  | 1.14560  | -0.71944 | 5.6      | 7.4                       |
| C(13) | A5  | 3.95322                  | -0.24483 | -1.15431 | -25.6    | -12.3                     |
| C(13) | B1  | 3.47080                  | -2.49341 | 0.00000  | -16.2    | -5.3                      |
| C(13) | B2  | 3.23058                  | -0.63160 | 2.28806  | 18.2     | 17.5                      |
| C(13) | B3  | 3.13937                  | 2.07235  | 1.41691  | -6.1     | -1.7                      |
| C(13) | B4  | 3.13937                  | 2.07234  | -1.41691 | -6.1     | -1.7                      |
| C(13) | B5  | 3.23058                  | -0.63160 | -2.28806 | 18.2     | 17.5                      |
| C(13) | C1  | 2.51307                  | -2.71348 | -1.17525 | 21.4     | 6.3                       |
| C(13) | C2  | 2.51307                  | -2.71347 | 1.17525  | 21.4     | 6.3                       |
| C(13) | C3  | 2.48227                  | -1.88734 | 2.27196  | -8.5     | -3.7                      |
| C(13) | C4  | 2.42082                  | 0.32931  | 2.98583  | -11.6    | -5.2                      |
| C(13) | C5  | 2.37884                  | 1.65896  | 2.57023  | 10.8     | 11.8                      |
| C(13) | C6  | 2.33089                  | 3.02864  | 0.69292  | -1.3     | -0.8                      |
| C(13) | C7  | 2.33089                  | 3.02864  | -0.69293 | -1.3     | -0.8                      |
| C(13) | C8  | 2.37884                  | 1.65895  | -2.57023 | 10.8     | 11.8                      |
| C(13) | C9  | 2.42082                  | 0.32930  | -2.98583 | -11.6    | -5.2                      |
| C(13) | C10 | 2.48227                  | -1.88735 | -2.27196 | -8.5     | -3.7                      |
| C(13) | D1  | 1.30278                  | -3.31868 | -0.71797 | -1.6     | -0.6                      |
| C(13) | D2  | 1.30278                  | -3.31867 | 0.71798  | -1.6     | -0.6                      |
| C(13) | D3  | 1.24291                  | -1.67948 | 2.98483  | 0.6      | 0.7                       |
| C(13) | D4  | 1.20390                  | -0.31931 | 3.42488  | 1.7      | 1.1                       |
| C(13) | D5  | 1.11918                  | 2.36745  | 2.56686  | -6.8     | -3.0                      |
| C(13) | D6  | 1.08913                  | 3.21677  | 1.41185  | 4.1      | 4.2                       |
| C(13) | D7  | 1.08913                  | 3.21677  | -1.41185 | 4.1      | 4.2                       |
| C(13) | D8  | 1.11918                  | 2.36745  | -2.56687 | -6.8     | -3.0                      |
| C(13) | D9  | 1.20390                  | -0.31932 | -3.42488 | 1.7      | 1.1                       |
| C(13) | D10 | 1.24291                  | -1.67949 | -2.98483 | 0.6      | 0.7                       |
| C(13) | E1  | 0.08518                  | -3.22983 | -1.45330 | 1.3      | 1.8                       |
| C(13) | E2  | 0.08518                  | -3.22982 | 1.45331  | 1.3      | 1.8                       |
| C(13) | E3  | 0.05794                  | -2.37537 | 2.63775  | -0.4     | -0.3                      |

|       |      |          |          |          |       |      |
|-------|------|----------|----------|----------|-------|------|
| C(13) | E4   | -0.02346 | 0.38459  | 3.52879  | -1.7  | -1.2 |
| C(13) | E5   | -0.06797 | 1.78201  | 3.07850  | 2.9   | 3.0  |
| C(13) | E6   | -0.12527 | 3.49444  | 0.73484  | -3.0  | -1.8 |
| C(13) | E7   | -0.12527 | 3.49444  | -0.73485 | -3.0  | -1.8 |
| C(13) | E8   | -0.06797 | 1.78200  | -3.07851 | 2.9   | 3.0  |
| C(13) | E9   | -0.02346 | 0.38459  | -3.52879 | -1.7  | -1.2 |
| C(13) | E10  | 0.05794  | -2.37537 | -2.63774 | -0.4  | -0.3 |
| C(13) | A1'  | -3.93492 | -1.35230 | 0.00000  | -0.1  | 0.0  |
| C(13) | A2'  | -3.96088 | -0.49893 | 1.17273  | -0.1  | 0.0  |
| C(13) | A3'  | -4.00682 | 0.87867  | 0.72401  | 0.0   | 0.5  |
| C(13) | A4'  | -4.00682 | 0.87867  | -0.72401 | 0.0   | 0.5  |
| C(13) | A5'  | -3.96088 | -0.49893 | -1.17273 | -0.1  | 0.0  |
| C(13) | B1'  | -3.15162 | -2.50373 | 0.00000  | 0.5   | 0.3  |
| C(13) | B2'  | -3.20590 | -0.83828 | 2.29353  | 0.0   | -0.1 |
| C(13) | B3'  | -3.29007 | 1.85507  | 1.41627  | 0.3   | 0.8  |
| C(13) | B4'  | -3.29007 | 1.85507  | -1.41627 | 0.3   | 0.8  |
| C(13) | B5'  | -3.20590 | -0.83829 | -2.29353 | 0.0   | -0.1 |
| C(13) | C1'  | -2.36365 | -2.84861 | -1.16385 | -0.5  | -0.4 |
| C(13) | C2'  | -2.36365 | -2.84861 | 1.16385  | -0.5  | -0.4 |
| C(13) | C3'  | -2.38986 | -2.03259 | 2.28500  | 0.6   | 0.3  |
| C(13) | C4'  | -2.45834 | 0.17816  | 3.00154  | -0.6  | -0.6 |
| C(13) | C5'  | -2.49944 | 1.49431  | 2.57099  | 0.5   | 0.2  |
| C(13) | C6'  | -2.54506 | 2.86122  | 0.69285  | -1.3  | 0.2  |
| C(13) | C7'  | -2.54506 | 2.86122  | -0.69286 | -1.3  | 0.2  |
| C(13) | C8'  | -2.49944 | 1.49430  | -2.57099 | 0.5   | 0.2  |
| C(13) | C9'  | -2.45834 | 0.17816  | -3.00154 | -0.6  | -0.6 |
| C(13) | C10' | -2.38986 | -2.03259 | -2.28499 | 0.6   | 0.3  |
| C(13) | D1'  | -1.11041 | -3.41398 | -0.71778 | -0.1  | 0.6  |
| C(13) | D2'  | -1.11041 | -3.41398 | 0.71779  | -0.1  | 0.6  |
| C(13) | D3'  | -1.16562 | -1.75766 | 3.00325  | -0.8  | -0.9 |
| C(13) | D4'  | -1.20508 | -0.39537 | 3.44314  | 0.9   | 0.5  |
| C(13) | D5'  | -1.28914 | 2.28994  | 2.56779  | -2.8  | -1.3 |
| C(13) | D6'  | -1.31864 | 3.13506  | 1.41221  | 3.8   | 4.1  |
| C(13) | D7'  | -1.31864 | 3.13506  | -1.41222 | 3.8   | 4.1  |
| C(13) | D8'  | -1.28914 | 2.28993  | -2.56779 | -2.8  | -1.3 |
| C(13) | D9'  | -1.20508 | -0.39537 | -3.44314 | 0.9   | 0.5  |
| C(13) | D10' | -1.16562 | -1.75767 | -3.00324 | -0.8  | -0.9 |
| H     | B1-H | 4.27536  | -3.24530 | 0.00000  | 104.5 | 4.3  |

**Table S4** C<sub>70</sub>H Isomer C

UB3LYP/6-311G(d,p)

SCF Energy -2668.3641965 a.u.

|       |     | Cartesian coordinates /Å |          |          | hfc /MHz | Mulliken spin density (%) |
|-------|-----|--------------------------|----------|----------|----------|---------------------------|
| C(13) | A1  | 3.98972                  | 1.01668  | 0.42506  | -9.3     | -3.7                      |
| C(13) | A2  | 3.98602                  | 0.57156  | -0.97685 | 18.3     | 19.0                      |
| C(13) | A3  | 3.92457                  | -0.86840 | -0.98408 | -10.2    | -3.2                      |
| C(13) | A4  | 3.89219                  | -1.32527 | 0.39144  | 1.1      | 1.4                       |
| C(13) | A5  | 3.93273                  | -0.16388 | 1.25559  | 1.9      | 2.4                       |
| C(13) | B1  | 3.30922                  | 2.15842  | 0.79906  | 18.0     | 6.0                       |
| C(13) | B2  | 3.25431                  | 1.29802  | -1.91836 | -23.1    | -10.9                     |
| C(13) | B3  | 3.16175                  | -1.53849 | -1.94976 | 8.2      | 10.0                      |
| C(13) | B4  | 3.10972                  | -2.42417 | 0.74289  | -1.6     | -1.2                      |
| C(13) | B5  | 3.18889                  | -0.15270 | 2.43742  | -1.6     | -0.8                      |
| C(13) | C1  | 2.50281                  | 2.14408  | 1.97672  | -2.0     | -0.6                      |
| C(13) | C2  | 2.69577                  | 3.13395  | -0.21039 | -17.3    | -4.9                      |
| C(13) | C3  | 2.53899                  | 2.48151  | -1.55632 | 44.1     | 43.0                      |
| C(13) | C4  | 2.46185                  | 0.60051  | -2.91533 | -1.8     | 1.6                       |
| C(13) | C5  | 2.41523                  | -0.78264 | -2.92825 | -0.2     | 2.4                       |
| C(13) | C6  | 2.33944                  | -2.66263 | -1.57368 | -6.7     | -2.5                      |
| C(13) | C7  | 2.31389                  | -3.09831 | -0.25773 | 2.5      | 2.1                       |
| C(13) | C8  | 2.32637                  | -2.39831 | 1.95905  | 0.0      | -0.1                      |
| C(13) | C9  | 2.36533                  | -1.28993 | 2.78866  | 0.1      | 0.0                       |
| C(13) | C10 | 2.45807                  | 1.02668  | 2.80498  | 1.8      | 2.3                       |
| C(13) | D1  | 1.29347                  | 2.91063  | 1.73343  | -1.8     | -1.2                      |
| C(13) | D2  | 1.32411                  | 3.40089  | 0.41343  | 16.6     | 4.8                       |
| C(13) | D3  | 1.31769                  | 2.51674  | -2.27507 | -25.5    | -12.9                     |
| C(13) | D4  | 1.26489                  | 1.36330  | -3.14338 | 14.8     | 16.1                      |
| C(13) | D5  | 1.15594                  | -1.45344 | -3.17356 | -5.3     | -3.3                      |
| C(13) | D6  | 1.10819                  | -2.61507 | -2.33901 | 6.9      | 7.5                       |
| C(13) | D7  | 1.06012                  | -3.49782 | 0.34389  | -1.7     | -1.0                      |
| C(13) | D8  | 1.06787                  | -3.06768 | 1.70995  | 0.8      | 0.6                       |
| C(13) | D9  | 1.14424                  | -0.80414 | 3.39528  | -0.2     | 0.3                       |
| C(13) | D10 | 1.19906                  | 0.62457  | 3.39832  | 0.0      | 1.1                       |
| C(13) | E1  | 0.07060                  | 2.59595  | 2.40082  | 1.8      | 1.6                       |
| C(13) | E2  | 0.13349                  | 3.53271  | -0.33667 | -6.4     | -2.8                      |
| C(13) | E3  | 0.12095                  | 3.08795  | -1.74465 | 11.8     | 11.7                      |

|       |      |          |          |          |       |      |
|-------|------|----------|----------|----------|-------|------|
| C(13) | E4   | 0.03754  | 0.74155  | -3.47427 | -12.3 | -6.7 |
| C(13) | E5   | -0.01974 | -0.72602 | -3.49226 | 3.5   | 1.8  |
| C(13) | E6   | -0.11837 | -3.08246 | -1.80124 | -5.5  | -3.2 |
| C(13) | E7   | -0.14339 | -3.54353 | -0.40656 | 1.9   | 1.4  |
| C(13) | E8   | -0.12681 | -2.67012 | 2.36401  | -0.9  | -0.7 |
| C(13) | E9   | -0.08818 | -1.49209 | 3.23959  | 0.3   | 0.4  |
| C(13) | E10  | 0.02398  | 1.40608  | 3.25643  | -0.6  | 0.1  |
| C(13) | A1'  | -3.92622 | 1.30891  | 0.37159  | 0.3   | 0.1  |
| C(13) | A2'  | -3.93074 | 0.87324  | -1.01140 | -2.1  | -1.4 |
| C(13) | A3'  | -3.99094 | -0.57548 | -1.02591 | 3.2   | 3.3  |
| C(13) | A4'  | -4.01742 | -1.03472 | 0.34869  | -1.7  | -0.7 |
| C(13) | A5'  | -3.97852 | 0.12997  | 1.21222  | 0.5   | 0.4  |
| C(13) | B1'  | -3.13928 | 2.39580  | 0.75093  | 0.1   | -0.2 |
| C(13) | B2'  | -3.14944 | 1.54327  | -1.95097 | 1.7   | 1.1  |
| C(13) | B3'  | -3.26594 | -1.28796 | -1.97986 | -4.7  | -2.1 |
| C(13) | B4'  | -3.31686 | -2.18487 | 0.70752  | 0.5   | 1.1  |
| C(13) | B5'  | -3.24099 | 0.08936  | 2.39451  | -0.5  | -0.4 |
| C(13) | C1'  | -2.37422 | 2.34572  | 1.97634  | 0.6   | 0.2  |
| C(13) | C2'  | -2.32478 | 3.08039  | -0.22809 | -1.4  | -1.5 |
| C(13) | C3'  | -2.32915 | 2.66420  | -1.54940 | 2.4   | 1.3  |
| C(13) | C4'  | -2.39531 | 0.79790  | -2.93524 | -10.3 | -5.4 |
| C(13) | C5'  | -2.45586 | -0.59001 | -2.95188 | 8.8   | 9.1  |
| C(13) | C6'  | -2.53681 | -2.47856 | -1.59933 | -1.1  | 0.2  |
| C(13) | C7'  | -2.56100 | -2.91641 | -0.28606 | 0.8   | 1.4  |
| C(13) | C8'  | -2.54775 | -2.21787 | 1.93121  | -0.8  | -0.2 |
| C(13) | C9'  | -2.51000 | -1.10462 | 2.75633  | 0.6   | 0.7  |
| C(13) | C10' | -2.42128 | 1.21754  | 2.77815  | -0.4  | -0.5 |
| C(13) | D1'  | -1.10889 | 3.01672  | 1.75555  | -1.7  | -1.2 |
| C(13) | D2'  | -1.07896 | 3.46672  | 0.39504  | 2.1   | 1.6  |
| C(13) | D3'  | -1.09090 | 2.62580  | -2.29698 | -12.2 | -6.5 |
| C(13) | D4'  | -1.13838 | 1.46731  | -3.15858 | 16.0  | 16.2 |
| C(13) | D5'  | -1.25123 | -1.35727 | -3.18346 | -5.9  | -3.5 |
| C(13) | D6'  | -1.29947 | -2.52164 | -2.35074 | 4.7   | 4.8  |
| C(13) | D7'  | -1.34688 | -3.40966 | 0.33051  | -1.5  | -1.0 |
| C(13) | D8'  | -1.33968 | -2.97975 | 1.69660  | 0.9   | 0.8  |
| C(13) | D9'  | -1.26434 | -0.71379 | 3.38085  | -0.1  | 0.2  |
| C(13) | D10' | -1.20853 | 0.71786  | 3.39011  | 0.0   | 0.1  |
| H     | C2-H | 3.28346  | 4.06332  | -0.28114 | 99.5  | 4.2  |

**Table S5** C<sub>70</sub>H Isomer **D**

UB3LYP/6-311G(d,p)

SCF Energy -2668.363796 a.u.

|       |     | Cartesian coordinates /Å |          |          | hfc /MHz | Mulliken spin density (%) |
|-------|-----|--------------------------|----------|----------|----------|---------------------------|
| C(13) | A1  | -3.97533                 | 1.07149  | -0.37336 | -2.4     | -0.6                      |
| C(13) | A2  | -3.96237                 | 0.67672  | 1.01101  | 1.3      | 1.4                       |
| C(13) | A3  | -3.93585                 | -0.77318 | 1.06428  | -1.3     | -0.7                      |
| C(13) | A4  | -3.94212                 | -1.27323 | -0.29648 | -0.7     | 1.4                       |
| C(13) | A5  | -3.96160                 | -0.13211 | -1.18710 | 3.5      | 4.6                       |
| C(13) | B1  | -3.23647                 | 2.19011  | -0.77297 | 1.7      | 1.6                       |
| C(13) | B2  | -3.21012                 | 1.41725  | 1.92361  | -1.1     | -0.3                      |
| C(13) | B3  | -3.16417                 | -1.41320 | 2.03160  | 0.7      | 0.4                       |
| C(13) | B4  | -3.17916                 | -2.39474 | -0.62665 | -0.3     | 1.9                       |
| C(13) | B5  | -3.22780                 | -0.16273 | -2.37027 | -6.3     | -2.7                      |
| C(13) | C1  | -2.46200                 | 2.14712  | -1.99951 | -14.4    | -7.9                      |
| C(13) | C2  | -2.51006                 | 2.97550  | 0.17601  | 10.0     | 2.5                       |
| C(13) | C3  | -2.46946                 | 2.57807  | 1.49136  | -3.2     | -1.3                      |
| C(13) | C4  | -2.40879                 | 0.74497  | 2.91792  | 2.6      | 2.3                       |
| C(13) | C5  | -2.38697                 | -0.63809 | 2.97491  | -2.6     | -1.9                      |
| C(13) | C6  | -2.37125                 | -2.56980 | 1.68259  | 0.8      | 0.5                       |
| C(13) | C7  | -2.37852                 | -3.04938 | 0.38199  | -2.5     | -0.9                      |
| C(13) | C8  | -2.41596                 | -2.42160 | -1.85459 | 4.9      | 6.2                       |
| C(13) | C9  | -2.44098                 | -1.32935 | -2.71104 | -5.1     | -2.0                      |
| C(13) | C10 | -2.47402                 | 0.99376  | -2.79329 | 13.4     | 13.7                      |
| C(13) | D1  | -1.28210                 | 2.91268  | -1.84600 | 33.5     | 24.1                      |
| C(13) | D2  | -1.33656                 | 3.67277  | -0.50493 | -13.5    | -4.0                      |
| C(13) | D3  | -1.21423                 | 2.61961  | 2.24241  | 7.6      | 8.0                       |
| C(13) | D4  | -1.18467                 | 1.49800  | 3.11325  | -5.4     | -2.7                      |
| C(13) | D5  | -1.13825                 | -1.32897 | 3.22024  | 2.7      | 2.1                       |
| C(13) | D6  | -1.12833                 | -2.51713 | 2.42319  | -2.4     | -1.8                      |
| C(13) | D7  | -1.14246                 | -3.49607 | -0.22720 | 4.5      | 4.5                       |
| C(13) | D8  | -1.16640                 | -3.10589 | -1.60626 | -5.3     | -3.3                      |
| C(13) | D9  | -1.22671                 | -0.88950 | -3.35424 | 10.4     | 10.4                      |
| C(13) | D10 | -1.25214                 | 0.55116  | -3.39651 | -11.0    | -6.4                      |
| C(13) | E1  | -0.08091                 | 2.53703  | -2.47223 | -20.2    | -10.8                     |
| C(13) | E2  | -0.02874                 | 3.55052  | 0.27378  | 19.7     | 16.8                      |
| C(13) | E3  | -0.01842                 | 3.12731  | 1.66070  | -10.0    | -4.5                      |

|       |      |          |          |          |       |      |
|-------|------|----------|----------|----------|-------|------|
| C(13) | E4   | 0.03708  | 0.84407  | 3.45296  | 3.8   | 3.7  |
| C(13) | E5   | 0.05830  | -0.62173 | 3.50396  | -2.8  | -1.5 |
| C(13) | E6   | 0.07889  | -3.03113 | 1.88232  | 2.6   | 1.7  |
| C(13) | E7   | 0.07022  | -3.53724 | 0.50377  | -5.2  | -2.9 |
| C(13) | E8   | 0.02404  | -2.74660 | -2.28960 | 3.5   | 2.1  |
| C(13) | E9   | -0.00798 | -1.59230 | -3.19679 | -10.2 | -5.7 |
| C(13) | E10  | -0.06272 | 1.31237  | -3.28393 | 7.0   | 4.3  |
| C(13) | A1'  | 3.92852  | 1.21536  | -0.46093 | -4.2  | -2.7 |
| C(13) | A2'  | 3.96184  | 0.81537  | 0.93213  | 1.2   | 0.6  |
| C(13) | A3'  | 3.98849  | -0.63344 | 0.97834  | -0.5  | -0.3 |
| C(13) | A4'  | 3.98077  | -1.12783 | -0.38497 | -2.3  | 0.0  |
| C(13) | A5'  | 3.94479  | 0.01235  | -1.27515 | 5.0   | 5.5  |
| C(13) | B1'  | 3.15247  | 2.30347  | -0.84992 | 3.6   | 2.8  |
| C(13) | B2'  | 3.22248  | 1.52531  | 1.87577  | -0.7  | -0.8 |
| C(13) | B3'  | 3.26852  | -1.30665 | 1.96397  | 0.2   | 0.1  |
| C(13) | B4'  | 3.25226  | -2.27590 | -0.70033 | 1.4   | 3.0  |
| C(13) | B5'  | 3.18408  | -0.04100 | -2.44224 | -6.9  | -2.8 |
| C(13) | C1'  | 2.35830  | 2.24794  | -2.06369 | -18.3 | -9.2 |
| C(13) | C2'  | 2.38288  | 3.02988  | 0.13006  | 2.3   | 1.7  |
| C(13) | C3'  | 2.41905  | 2.65534  | 1.46458  | -1.8  | -1.5 |
| C(13) | C4'  | 2.46966  | 0.82079  | 2.89016  | 1.7   | 0.9  |
| C(13) | C5'  | 2.49103  | -0.56443 | 2.93183  | -1.5  | -1.3 |
| C(13) | C6'  | 2.50657  | -2.48882 | 1.62714  | 1.3   | 0.9  |
| C(13) | C7'  | 2.49906  | -2.96147 | 0.32480  | -3.6  | -1.4 |
| C(13) | C8'  | 2.46212  | -2.32637 | -1.90957 | 3.2   | 4.2  |
| C(13) | C9'  | 2.42863  | -1.23437 | -2.76265 | -5.0  | -1.6 |
| C(13) | C10' | 2.38015  | 1.08899  | -2.84412 | 14.9  | 15.4 |
| C(13) | D1'  | 1.13710  | 2.95948  | -1.85578 | 29.8  | 28.9 |
| C(13) | D2'  | 1.13626  | 3.44255  | -0.47170 | -17.2 | -8.4 |
| C(13) | D3'  | 1.19814  | 2.65550  | 2.22482  | 4.2   | 3.5  |
| C(13) | D4'  | 1.22531  | 1.52624  | 3.11041  | -3.8  | -2.6 |
| C(13) | D5'  | 1.27062  | -1.29369 | 3.19862  | 2.2   | 1.6  |
| C(13) | D6'  | 1.28013  | -2.48009 | 2.39617  | -2.3  | -2.0 |
| C(13) | D7'  | 1.26591  | -3.45053 | -0.25764 | 6.5   | 7.1  |
| C(13) | D8'  | 1.24280  | -3.05836 | -1.63277 | -5.4  | -3.2 |
| C(13) | D9'  | 1.18254  | -0.83829 | -3.37757 | 12.7  | 13.5 |
| C(13) | D10' | 1.15379  | 0.59619  | -3.41709 | -12.7 | -7.5 |
| H     | D2-H | -1.55522 | 4.73954  | -0.66963 | 81.3  | 3.5  |

**Table S6** C<sub>70</sub>H Isomer E

UB3LYP/6-311G(d,p)

SCF Energy -2668.3454838 a.u.

|       |     | Cartesian coordinates /Å |          |          | hfc /MHz | Mulliken spin density (%) |
|-------|-----|--------------------------|----------|----------|----------|---------------------------|
| C(13) | A1  | -3.96846                 | 1.11059  | -0.49306 | -3.5     | -1.8                      |
| C(13) | A2  | -3.96926                 | 0.79834  | 0.92116  | 6.3      | 6.5                       |
| C(13) | A3  | -3.96540                 | -0.64392 | 1.06172  | -4.0     | -1.9                      |
| C(13) | A4  | -3.96651                 | -1.22423 | -0.26789 | 1.1      | 0.5                       |
| C(13) | A5  | -3.96812                 | -0.13817 | -1.22877 | -0.4     | -0.8                      |
| C(13) | B1  | -3.22676                 | 2.19215  | -0.96242 | 3.3      | 3.4                       |
| C(13) | B2  | -3.21354                 | 1.58302  | 1.79520  | -8.0     | -3.6                      |
| C(13) | B3  | -3.21909                 | -1.24295 | 2.07547  | 3.4      | 3.3                       |
| C(13) | B4  | -3.21901                 | -2.37183 | -0.52299 | -0.8     | -0.9                      |
| C(13) | B5  | -3.22139                 | -0.25035 | -2.39981 | 0.4      | -0.1                      |
| C(13) | C1  | -2.44412                 | 2.06138  | -2.16352 | 5.7      | 4.5                       |
| C(13) | C2  | -2.44845                 | 3.01136  | -0.05037 | -18.6    | -8.7                      |
| C(13) | C3  | -2.44548                 | 2.70085  | 1.30438  | 14.8     | 14.0                      |
| C(13) | C4  | -2.43401                 | 0.95090  | 2.83822  | 0.9      | 1.2                       |
| C(13) | C5  | -2.43887                 | -0.42734 | 2.98003  | -0.8     | -0.5                      |
| C(13) | C6  | -2.44020                 | -2.43026 | 1.80248  | -2.6     | -1.4                      |
| C(13) | C7  | -2.43993                 | -2.98327 | 0.53173  | 2.3      | 1.6                       |
| C(13) | C8  | -2.44003                 | -2.47886 | -1.73773 | -2.3     | -2.0                      |
| C(13) | C9  | -2.44065                 | -1.44076 | -2.65480 | 2.7      | 1.8                       |
| C(13) | C10 | -2.44035                 | 0.87217  | -2.86871 | -5.4     | -3.7                      |
| C(13) | D1  | -1.20976                 | 2.80721  | -1.98220 | -24.1    | -13.5                     |
| C(13) | D2  | -1.23821                 | 3.42104  | -0.71215 | 38.0     | 33.3                      |
| C(13) | D3  | -1.19343                 | 2.75789  | 2.05270  | -9.1     | -3.8                      |
| C(13) | D4  | -1.19979                 | 1.68296  | 2.99809  | 2.3      | 2.1                       |
| C(13) | D5  | -1.20543                 | -1.12241 | 3.28082  | -1.2     | -0.9                      |
| C(13) | D6  | -1.20568                 | -2.35567 | 2.55470  | 1.7      | 1.4                       |
| C(13) | D7  | -1.20548                 | -3.47932 | -0.03570 | -3.9     | -2.7                      |
| C(13) | D8  | -1.20515                 | -3.17003 | -1.43332 | 3.1      | 2.4                       |
| C(13) | D9  | -1.20395                 | -1.05125 | -3.29996 | -6.9     | -4.7                      |
| C(13) | D10 | -1.20383                 | 0.37268  | -3.43083 | 8.4      | 8.0                       |
| C(13) | E1  | 0.00001                  | 2.38434  | -2.61117 | 23.0     | 24.4                      |
| C(13) | E2  | 0.00000                  | 3.85637  | 0.05536  | -22.8    | -7.5                      |
| C(13) | E3  | 0.00000                  | 3.23054  | 1.48890  | 38.7     | 10.2                      |

|       |      |          |          |          |       |       |
|-------|------|----------|----------|----------|-------|-------|
| C(13) | E4   | -0.00001 | 1.03983  | 3.38879  | -1.6  | -1.0  |
| C(13) | E5   | -0.00001 | -0.41826 | 3.53474  | 1.5   | 1.2   |
| C(13) | E6   | 0.00000  | -2.91804 | 2.05947  | -2.7  | -1.4  |
| C(13) | E7   | 0.00000  | -3.50208 | 0.71422  | 4.5   | 4.5   |
| C(13) | E8   | 0.00001  | -2.87242 | -2.12091 | -3.2  | -1.9  |
| C(13) | E9   | 0.00001  | -1.77278 | -3.09170 | 5.5   | 4.9   |
| C(13) | E10  | 0.00001  | 1.12270  | -3.35047 | -13.8 | -6.0  |
| C(13) | A1'  | 3.96846  | 1.11059  | -0.49305 | -3.5  | -1.8  |
| C(13) | A2'  | 3.96925  | 0.79834  | 0.92117  | 6.3   | 6.5   |
| C(13) | A3'  | 3.96539  | -0.64391 | 1.06174  | -4.0  | -1.9  |
| C(13) | A4'  | 3.96651  | -1.22423 | -0.26787 | 1.1   | 0.5   |
| C(13) | A5'  | 3.96812  | -0.13817 | -1.22875 | -0.4  | -0.8  |
| C(13) | B1'  | 3.22675  | 2.19215  | -0.96241 | 3.3   | 3.4   |
| C(13) | B2'  | 3.21353  | 1.58302  | 1.79522  | -8.0  | -3.6  |
| C(13) | B3'  | 3.21908  | -1.24295 | 2.07548  | 3.4   | 3.3   |
| C(13) | B4'  | 3.21902  | -2.37183 | -0.52298 | -0.8  | -0.9  |
| C(13) | B5'  | 3.22140  | -0.25035 | -2.39980 | 0.4   | -0.1  |
| C(13) | C1'  | 2.44412  | 2.06138  | -2.16351 | 5.7   | 4.5   |
| C(13) | C2'  | 2.44844  | 3.01136  | -0.05036 | -18.6 | -8.7  |
| C(13) | C3'  | 2.44548  | 2.70085  | 1.30440  | 14.8  | 14.0  |
| C(13) | C4'  | 2.43399  | 0.95091  | 2.83823  | 0.9   | 1.2   |
| C(13) | C5'  | 2.43886  | -0.42733 | 2.98004  | -0.8  | -0.5  |
| C(13) | C6'  | 2.44020  | -2.43026 | 1.80249  | -2.6  | -1.4  |
| C(13) | C7'  | 2.43993  | -2.98327 | 0.53175  | 2.3   | 1.6   |
| C(13) | C8'  | 2.44004  | -2.47886 | -1.73772 | -2.3  | -2.0  |
| C(13) | C9'  | 2.44066  | -1.44076 | -2.65480 | 2.7   | 1.8   |
| C(13) | C10' | 2.44036  | 0.87216  | -2.86871 | -5.4  | -3.7  |
| C(13) | D1'  | 1.20977  | 2.80721  | -1.98221 | -24.1 | -13.5 |
| C(13) | D2'  | 1.23822  | 3.42105  | -0.71214 | 38.0  | 33.3  |
| C(13) | D3'  | 1.19342  | 2.75789  | 2.05271  | -9.1  | -3.8  |
| C(13) | D4'  | 1.19977  | 1.68296  | 2.99809  | 2.3   | 2.1   |
| C(13) | D5'  | 1.20542  | -1.12241 | 3.28082  | -1.2  | -0.9  |
| C(13) | D6'  | 1.20567  | -2.35567 | 2.55471  | 1.7   | 1.4   |
| C(13) | D7'  | 1.20548  | -3.47932 | -0.03570 | -3.9  | -2.7  |
| C(13) | D8'  | 1.20516  | -3.17003 | -1.43331 | 3.1   | 2.4   |
| C(13) | D9'  | 1.20397  | -1.05126 | -3.29995 | -6.9  | -4.7  |
| C(13) | D10' | 1.20385  | 0.37268  | -3.43083 | 8.4   | 8.0   |
| H     | E2-H | -0.00001 | 4.95555  | 0.16536  | 158.3 | 6.6   |
